# Supplementary material for: Evaluation of the NAQFC driven by the NOAA Global Forecast System (version 16): comparison with the WRF-CMAQ during the summer 2019 FIREX-AQ campaign
Source: Copernicus journal article supplement (doi:10.5194/gmd-15-7977-2022), 2022-11-07
Supplement: Supplementary file 1 [file gmd-15-7977-2022-supplement.pdf]

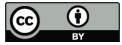

*Supplement of*

**Evaluation of the NAQFC driven by the NOAA Global Forecast System (version 16): comparison with the WRF-CMAQ during the summer 2019 FIREX-AQ campaign**

**Youhua Tang et al.**

*Correspondence to:* Youhua Tang ([youhua.tang@noaa.gov](mailto:youhua.tang@noaa.gov))

The copyright of individual parts of the supplement might differ from the article licence.

# Supplemental Figures

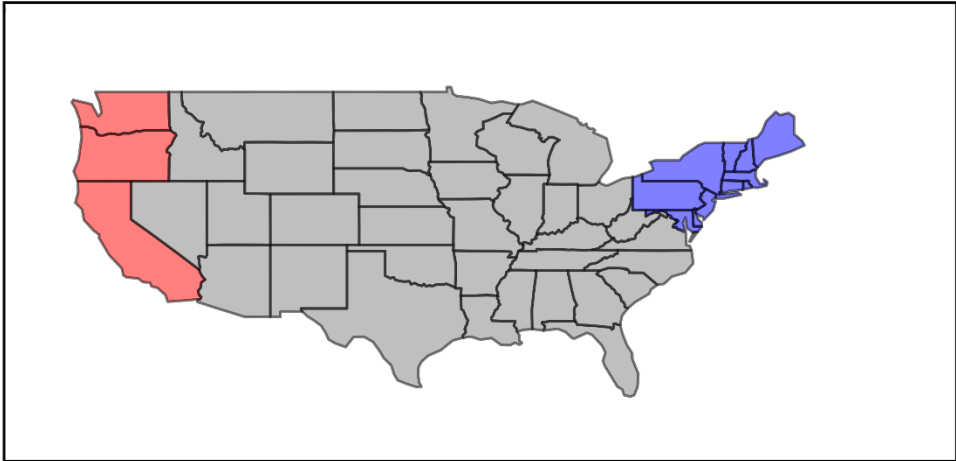

Figure S1, U.S. West (red) and Northeast (Blue) regions.

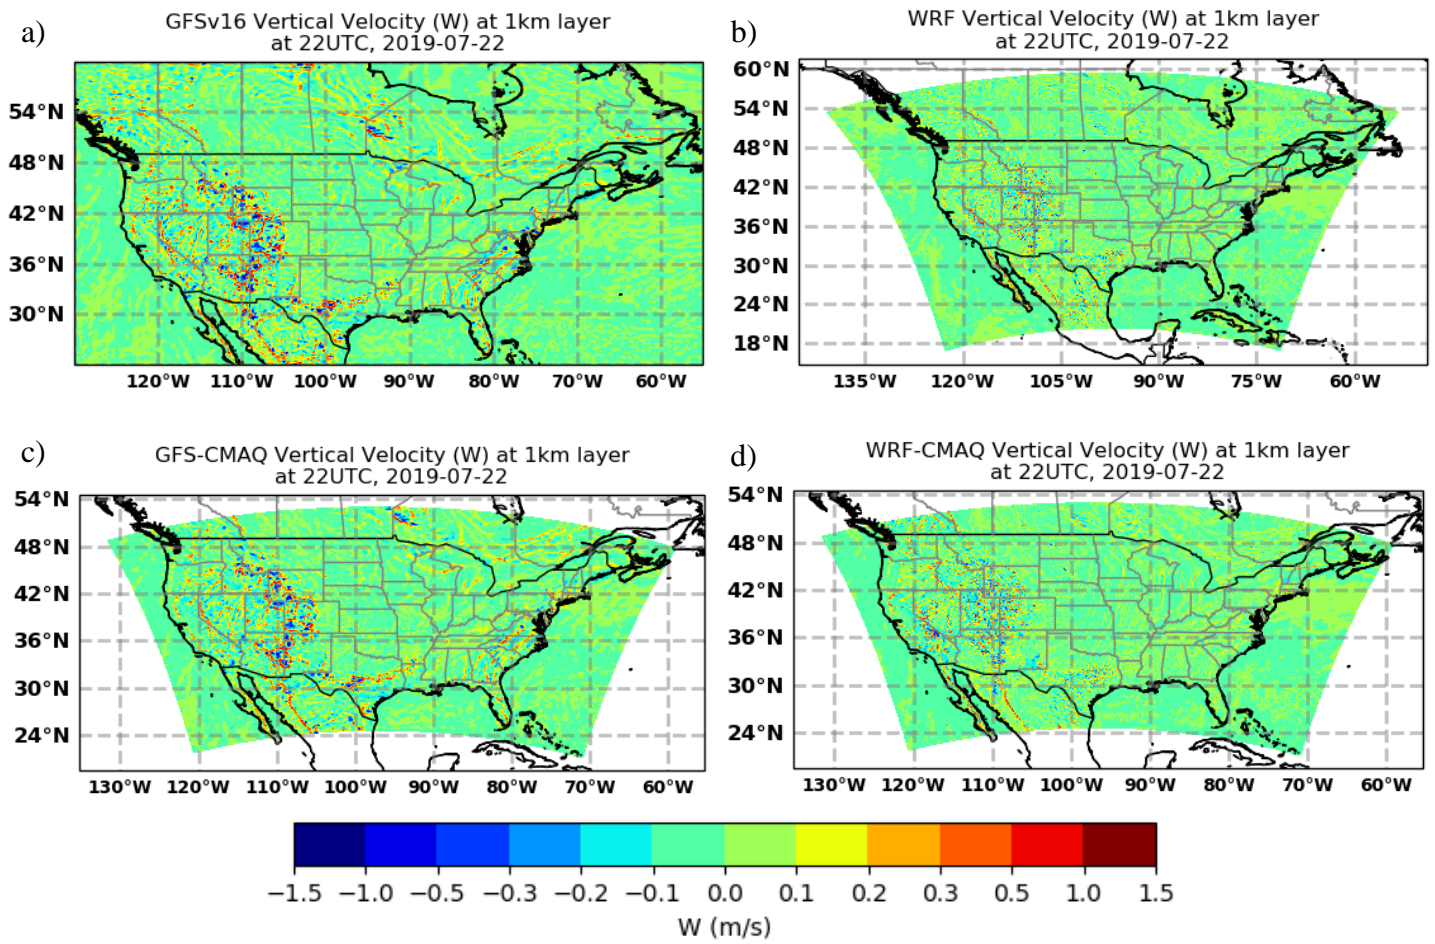

Figure S2, The original vertical velocities of GFS (a) and WRF (b) compared to the CMAQ diagnosed W in GFS-CMAQ (c) and WRF-CMAQ (d)

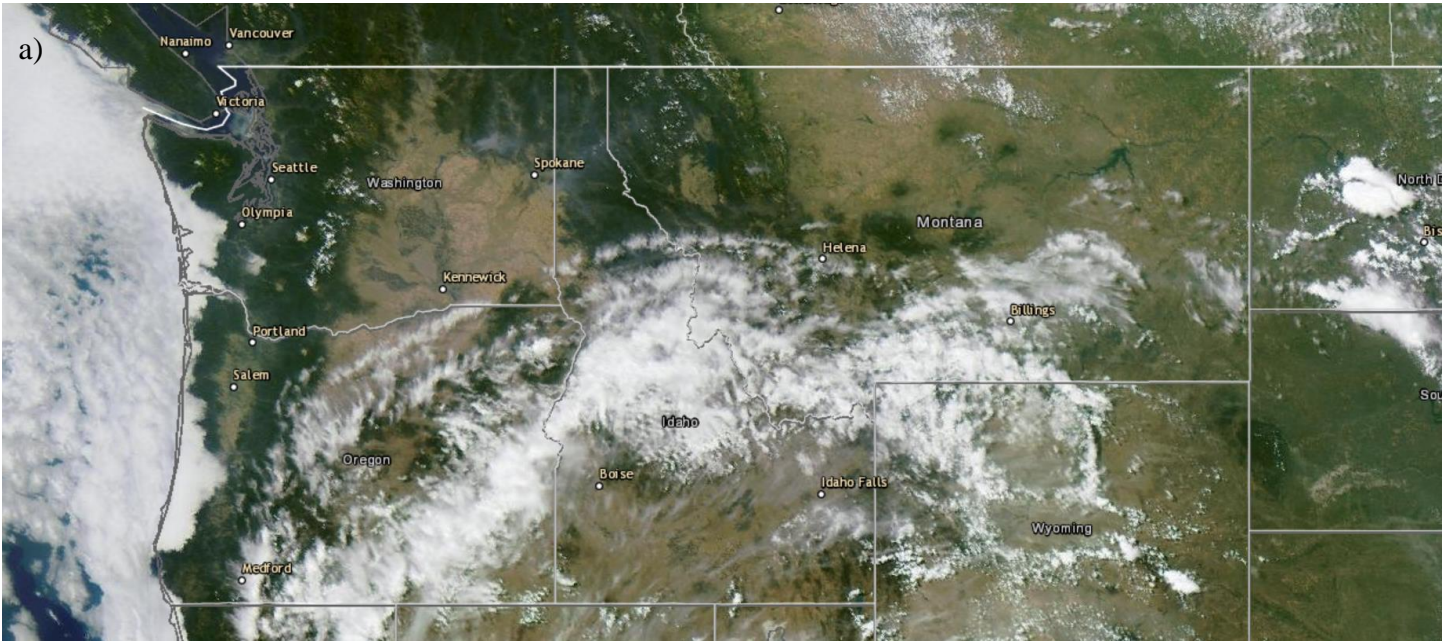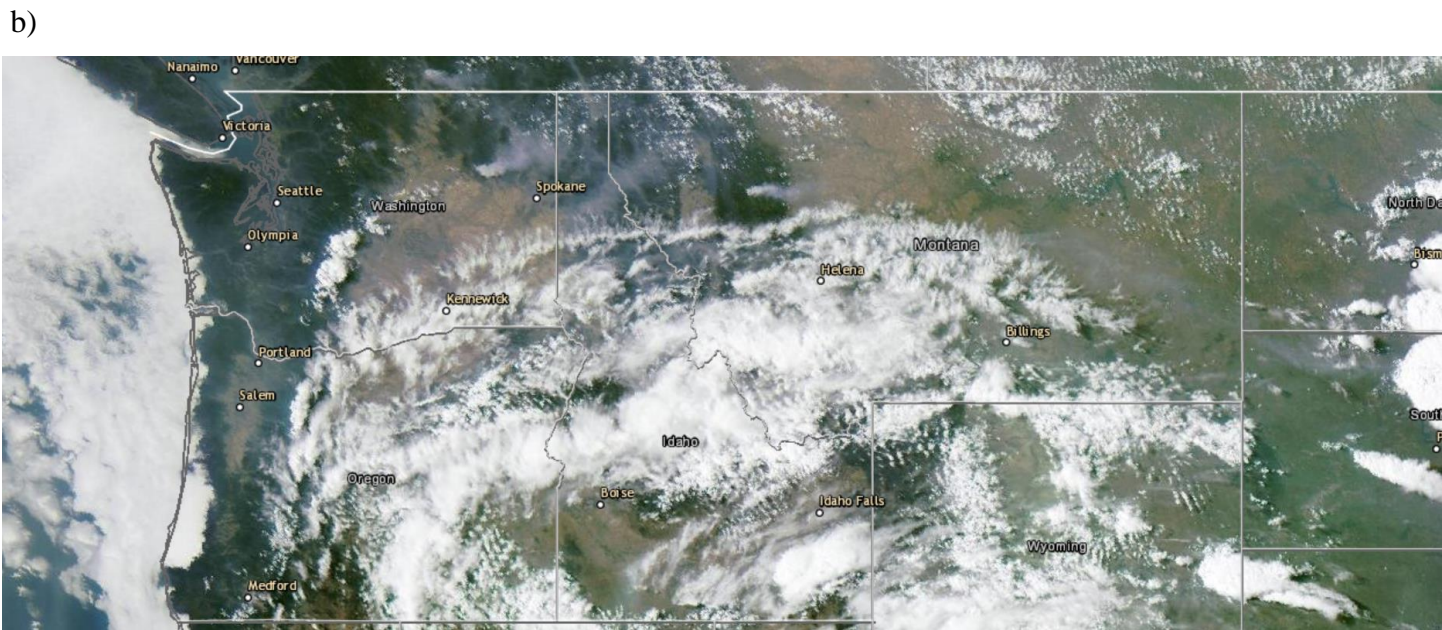

Figure S3, GOES-16 true color image (NOAA Aerosol Watch) at 19:41UTC (a), and 23:01UTC (b), 06 August, 2019

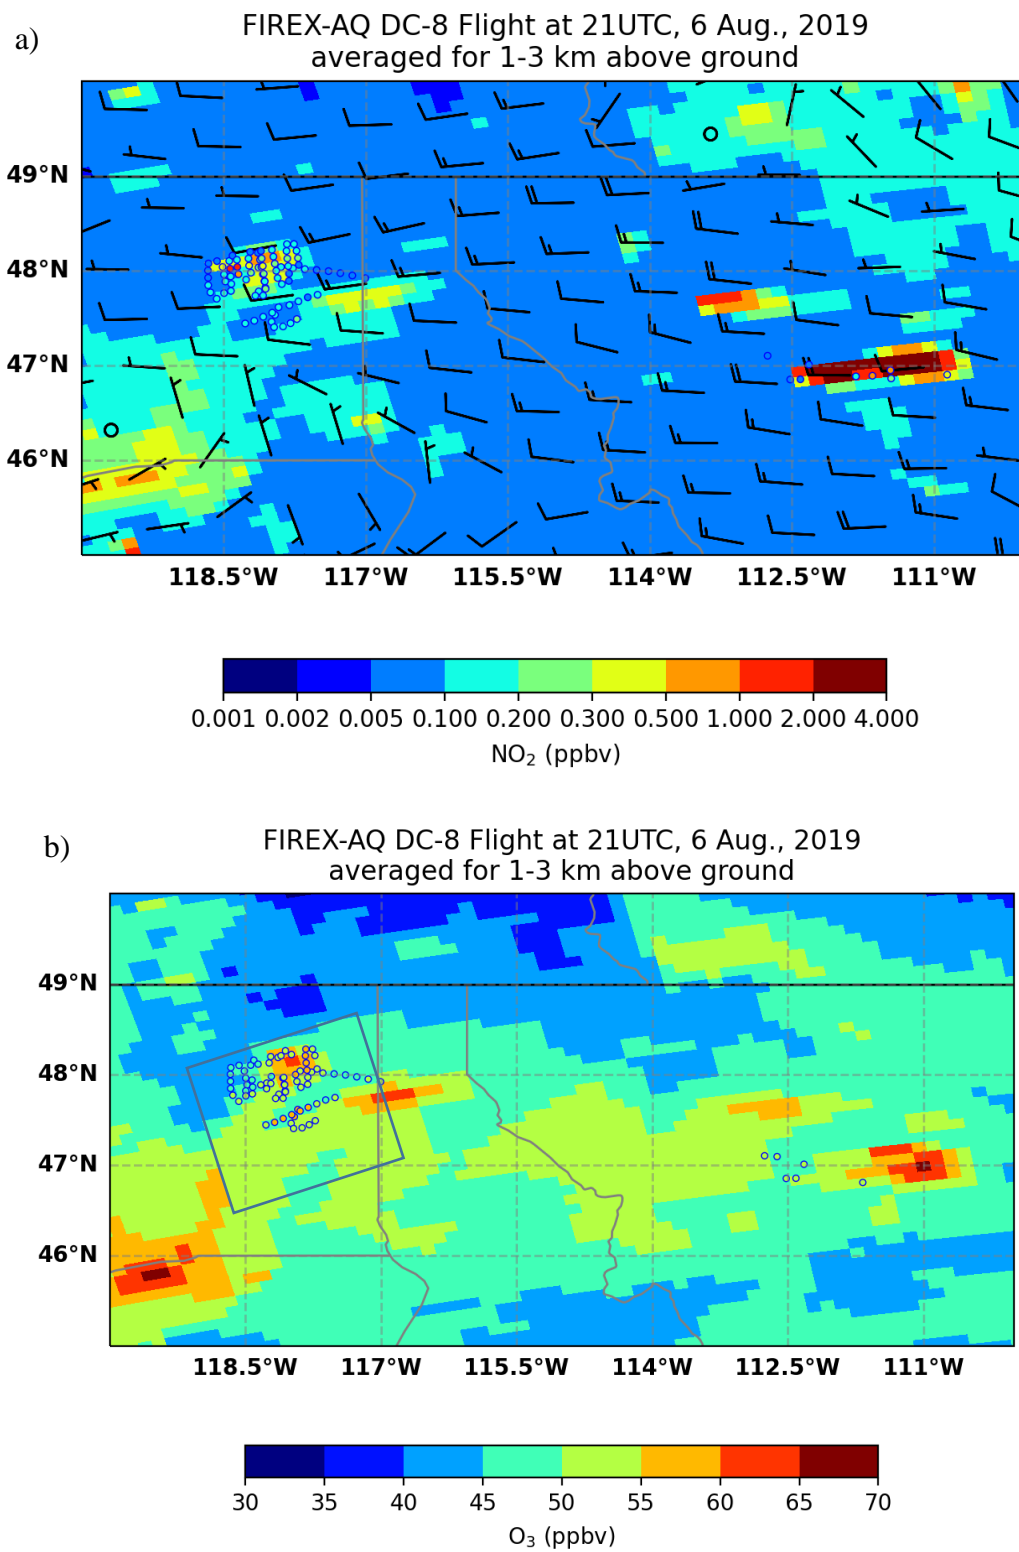

Figure S4, GFS-CMAQ vertical averaged NO<sub>2</sub> (a) and O<sub>3</sub> (b) for 1-3 km above ground at 21UTC compared to the DC-8 observations on 6 Aug., 2019. The plot a also shows the corresponding GFS wind field.
